# Supplementary material
Source: PubMed Central journal article supplement (PMC3041169)

**Supplemental Figure 1:** p53 and Hdm2 binding affinities of HdmXG57A and HdmXC437G mutants. Co-immunoprecipitations were completed using HdmX, Hdm2, HdmXG57A and HdmXC437G proteins generated in the Promega TNT Coupled Reticulocyte Lysate System. Western blots demonstrating input proteins are shown in the top panel (Input). Western blots from co-immunoprecipitated material are shown in the bottom panel (IP). HdmXC437G did not bind Hdm2 but retained p53 binding ability while HdmXG57A did not bind p53 but retained Hdm2 binding ability as previously reported for both mutants.

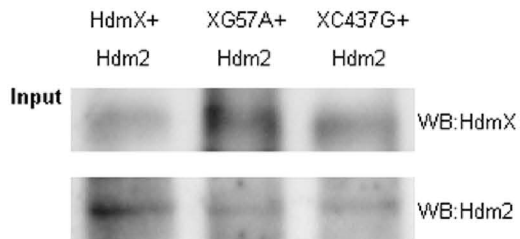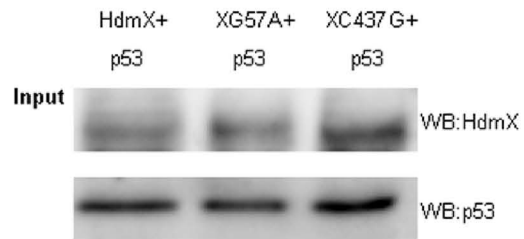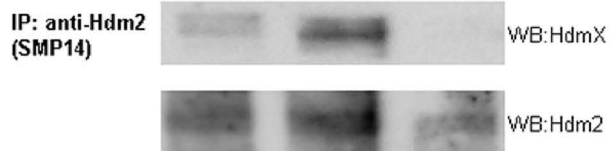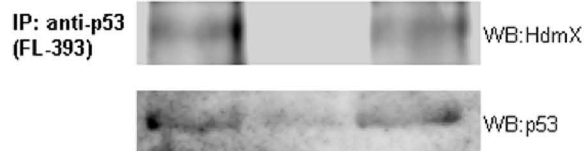

Supplement: cc0916_3376SD1.pdf [file cc0916_3376SD1.pdf]
